# Supplementary material
Source: Research Square preprint supplement (doi:10.21203/rs.3.rs-9945842/v1)
Supplement: Supplementary file 1 [file 1fe7dff16c4ffbb1212829b1.docx]

**S1.** **Divergent trajectories of resilience and food insecurity across sub-Saharan Africa**

Food system resilience and undernourishment followed divergent trajectories across SSA. Ethiopia, Ghana, Rwanda, and Kenya showed sustained gains in FSRI from 1990 to 2023. In contrast, Somalia, the Democratic Republic of the Congo, Zambia, and Zimbabwe remained persistently low. Mozambique and Madagascar improved moderately, but undernourishment remained high. By the final period, Ethiopia, Ghana, and Rwanda had moved from the high-PoU, low-FSRI quadrant to the moderate-PoU, high-FSRI quadrant (Extended Data Fig. 2a).

Regional differences were marked. Eastern and Central Africa, especially Somalia and the Democratic Republic of the Congo, remained persistent hotspots of low FSRI and high PoU. Western and Southern Africa were more heterogeneous. Ghana and Botswana improved in both resilience and food security, whereas other countries in these regions continued to face substantial burdens (Extended Data Fig. 2b).

The relationship between FSRI and PoU strengthened over time. In the early period, the association was weak. By the final period, a clearer negative gradient emerged, with countries clustering along a downward slope. This suggests a stronger protective role of resilience. However, a resilience paradox remained evident. In Ethiopia, Kenya, Ghana, and Nigeria, FSRI improved without a corresponding decline in PoU, which remained moderate to high. South Africa combined high FSRI with low PoU, although PoU still remained above the FAO hunger threshold (Extended Data Fig. 2b).

Together, these patterns show that resilience gains are uneven and do not automatically translate into lower undernourishment. Persistent vulnerability in Eastern and Central Africa, together with the resilience paradox in several improving countries, points to hidden limits in food-system response.

**S2. Dynamics of repeated climate shocks and food security outcomes in sub-Saharan Africa**. Single and clustered shocks produced distinct food security responses. After a single shock, PoU remained near baseline in the shock year, then rose by 1.6 percentage points at t+1 before partially recovering by t+2. This pattern suggests a lagged but temporary effect. Clustered shocks, defined as two or more events in the same year, had larger and more persistent effects. PoU increased by 1.1 percentage points in the shock year and peaked at 3.1 percentage points at t+1. It then declined more slowly and remained elevated at t+2. In both cases, changes at t−2 and t−1 were negligible, indicating a stable pre-shock baseline (Extended Data Fig. 3a).

Recovery also depended on the spacing between shocks. Countries with inter-shock gaps of less than six months had the highest mean PoU (22.3%). Mean PoU fell to 19.8% for gaps of seven to twelve months and to 15.2% for gaps of thirteen to twenty-four months. The GAM smooth followed the same monotonic pattern, confirming that longer recovery windows are associated with lower food insecurity (Extended Data Fig. 3b).

Five-year shock frequency showed a nonlinear association with PoU. Mean PoU ranged from 13.2% to 31.7% across the observed shock spectrum. PoU increased with shock count at first, with a positive linear term (β=2.754, p=0.0002), but the marginal increase weakened at higher frequencies, as shown by the negative quadratic term (β=−0.118, p=0.0013; R2 =0.020). The turning point occurred at roughly ten to twelve shocks over five years. Beyond this level, PoU flattened and then declined slightly, which may reflect survivor bias or structural differences among the most shock-exposed countries (Extended Data Fig. 3c).

Together, these results identify three pathways through which repeated shocks erode food security. Clustering amplifies peak effects. Short gaps prevent full recovery. Cumulative exposure increases food insecurity up to a point, after which the pattern becomes less informative at the extreme tail. Taken together, the timing, spacing, and accumulation of shocks matter more than any single event alone.

**S3. Resilience factor contributions to food security**

Resilience factors contribute unevenly to food security, and their protective effects weaken as shocks accumulate. Multidimensional resilience, captured by the FSRI, provides the strongest overall buffering effect, but it does not eliminate undernourishment. Economic capacity and agricultural productivity are also strongly associated with lower PoU, although their protection declines rapidly under repeated shocks.

Across all factors, GDP per capita shows the strongest association with PoU, followed by agricultural value added, infrastructure, cereal imports, FSRI and irrigated land (Extended Data Fig. 3a). Normalized importance scores are 100%, 93%, 47%, 44%, 44% and 37%, respectively. Yet all six factors lose effectiveness as shock frequency rises (Extended Data Fig. 3b). FSRI retains 85% of its protective effect under single shocks, but only 55% under repeated shocks. GDP per capita falls from 68% to near zero, and infrastructure declines from 81% to 30%. Irrigated land, agricultural value added and cereal imports show even steeper losses.

In the fixed-effects models, FSRI shows the largest protective association with PoU, followed by GDP per capita and infrastructure (Extended Data Fig. 4c). Irrigated land and agricultural value added remain significant, whereas cereal imports do not.

Together, these results show that no single sector is sufficient on its own. Multidimensional resilience provides the most durable protection, but even this protection weakens under recurrent climate stress

**S4. Sensitivity analysis confirms a stable resilience threshold across time and space**

The resilience threshold is stable across time and space. In the full sample, the shock intensity at which the protective effect of FSRI on undernourishment becomes non-significant is 0.30. Re-estimating the threshold for two periods, 1990–2005 and 2006–2023, and for four regions, Western, Eastern, Central and Southern Africa, produced similar values. Estimates ranged from 0.24 in 2006–2023 to 0.32 in Central Africa. The confidence intervals overlapped with the full-sample estimate, indicating strong temporal and spatial stability (Extended Data Fig. 5a).

The bootstrap distribution supports the same conclusion. Among 1,000 bootstrap replicates, only four fell below 0.24 and three exceeded 0.36. Most estimates clustered around 0.30 (Extended Data Fig. 5b). The distribution was narrow and approximately symmetric, showing that the threshold is not driven by sampling noise or influential observations.

**S5. Robustness check using child stunting**

To assess robustness, we repeated the core analyses using child stunting as the outcome (Extended Data Fig. 6; Extended Data Table 2). The results were consistent with the primary analyses. The interaction between FSRI and shock frequency remained negative and significant (β = –0.29, 95% CI: –0.36 to –0.21). The resilience threshold – the shock intensity at which FSRI no longer buffers stunting – was 28% of the population affected (95% CI: 22–34%). The counterfactual analysis indicated that, in the absence of climate shocks, regional stunting would have been 2.9 percentage points lower (95% CI: 2.2–3.6). In low‑FSRI countries, the tipping point for severe stunting (probability > 50%) occurred at 13.2 shocks over five years (95% CI: 11.5–14.8).

These estimates closely matched those from the primary analyses using undernourishment (threshold of 30%, 95% CI: 24–36%), confirming that the main conclusions are robust to the choice of food security indicator.

**S6. Forward-looking projections of food system resilience under intensified climate shocks**

Intensified climate shocks are projected to increase undernourishment by mid-century. We projected PoU to 2050 under three scenarios: a baseline in which shocks remain at pre-1990 levels, a 20% increase in shock frequency, and a 50% increase (**Extended Data Fig. 7a**). Under the baseline, regional PoU declines from 12.7% in 2030 to 11.5% in 2050. Higher shock frequencies weaken this decline. Under the 20% scenario, PoU reaches 11.8% in 2050, and under the 50% scenario it reaches 12.0%. The gap between the baseline and +50% scenarios widens over time, reaching 0.5 percentage points by 2050. At a projected regional population of 2.6 billion, this difference corresponds to roughly 13 million additional undernourished people.

Projected impacts are uneven across space. The largest increases are concentrated in Eastern and Central Africa. Under the +50% scenario, Somalia, Zambia, Rwanda, Madagascar and the Democratic Republic of the Congo are projected to experience additional undernourishment of 0.8–1.2 percentage points by 2050. Many of these countries already have high baseline PoU, so even modest percentage-point increases translate into a large rise in the absolute number of undernourished people (**Extended Data Fig. 7b)**.
